# Supplementary material
Source: PubMed Central journal article supplement (PMC3568965)
Supplement: Supp_Fig1.pdf [file Supp_Fig1.pdf]

## Supplementary Data

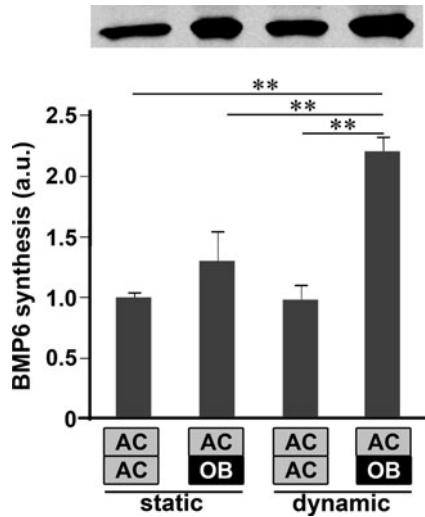

**SUPPLEMENTARY FIG. S1.** Biomechanical stimulation induces significantly greater levels of BMP6 secretion in the osteochondral constructs. Supernatants of AC/AC or AC/OB constructs with or without mechanical stimulation for 1 week were collected 4 h after the last mechanical stimulation regimen. The samples were 20 times concentrated using a Microcon Ultracel YM-10 concentrator (Millipore). The enriched samples were subjected to Western blot analysis using BMP6 antibody (Abcam) and 800-IRDye secondary antibody (Li-Cor). Odyssey image scanner (Li-Cor) was used to assess the intensity of bands. One-way analysis of variance was used to test statistical significance using SPSS ( $n=3$ ,  $**p>0.01$ ). AC, articular chondrocyte; OB, osteoblast.
